# Supplementary material for: Selection of the Salt Tolerance Gene GmSALT3 During Six Decades of Soybean Breeding in China
Source: Front Plant Sci. 2021 Nov 16;12:794241. doi: 10.3389/fpls.2021.794241 (PMC8635242; doi:10.3389/fpls.2021.794241)
Supplement: Supplementary file 3 [file Table_1.xlsx]

## Sheet: Sheet1
Table S1. Description of 279 Chinese soybean landraces. Data include province of origin, ecoregion and haplotype of GmSALT3. NR (northern region of China), HHR (Huanghuai region of China), SR (Southern region of China)
Name	Country	Province/State	Ecoregion	Haplotype of GmSALT3
QingDou6	China	ZheJiang	SR	H5-2
WanHuangDaDou	China	JiangXi	SR	H3
HongPiDaDou2	China	JiangXi	SR	H1
JinNanHuangDou	China	HuNan	SR	H5-1
QiPingQingDou	China	HuNan	SR	H5-1
LongShanHeiPiDou	China	HuNan	SR	H4
JunShanDaQingDou	China	HuNan	SR	H5-1
ShaShiHeNanDou	China	HuNan	SR	H5-1
XiaoHuangDou9	China	GuiZhou	SR	H5-1
QingPiHuangDou	China	GuiZhou	SR	H4
LingChuanHuangDou	China	GuangXi	SR	H1
XiaoKeHuangDou1	China	GuangXi	SR	H3
DaDou2	China	YunNan	SR	H5-1
YangJiaoMi	China	HeiLongJiang	NR	H1
TuJiaZi	China	HeiLongJiang	NR	H2
YaPoChe	China	HeiLongJiang	NR	H1
BaiMaoShuang	China	HeiLongJiang	NR	H2
XiaoBaiDou1	China	HeiLongJiang	NR	H2
HuaNanXiaoJinDou	China	HeiLongJiang	NR	H2
BaoQingLvDaDou	China	HeiLongJiang	NR	H2
MoHeMoShiDou	China	HeiLongJiang	NR	H2
ZiHua1Hao	China	JiLin	NR	H2
YuanBaoJin2	China	JiLin	NR	H1
Ha1Hao	China	JiLin	NR	H1
DaLiHuang1	China	JiLin	NR	H1
DuLuMei	China	JiLin	NR	H2
XiaoBaiQi1	China	JiLin	NR	H1
JiaoHeZiHua1Hao	China	JiLin	NR	H2
ShuLanManCangJin	China	JiLin	NR	H1
HeiMoDou	China	JiLin	NR	H4
XiaoLiHei	China	LiaoNing	NR	H4
XiaoLiHeiDou1	China	LiaoNing	NR	H4
LianMaoHuiHeiDou	China	LiaoNing	NR	H4
Qian'AnXiaoHuangDou	China	JiLin	NR	H1
YongJiZaoDou	China	JiLin	NR	H2
KeQiXiaoLiHeiDou	China	NeiMengGu	NR	H1
XiaoHeiDou3	China	ShanXi	NR	H1
DaHuangDou3	China	ShanXi	NR	H1
CanSiDou2	China	ShanXi	NR	H4
HeiDou26	China	GanSu	NR	H3
YanTianQingPiDou	China	JiangXi	SR	H5-1
JingDou26	China	HuBei	SR	H1
ShuGuangHuangDou	China	HuBei	SR	H1
HeiHuangDou2	China	HuBei	SR	H3
HeiDaDou4	China	HuBei	SR	H5-1
JiuYueBao	China	HuBei	SR	H5-1
LvDouZi	China	SiChuan	SR	H5-1
QingPiDou2	China	SiChuan	SR	H5-1
LuoShi-1	China	SiChuan	SR	H4
XiZangDaDou18	China	Tibet	SR	H4
DaLiDou2	China	ZheJiang	SR	H1
LanXiShanDou	China	ZheJiang	SR	H1
HuangCunQingDou	China	ZheJiang	SR	H1
HuZhenHeiDou	China	ZheJiang	SR	H4
HuangTianYangDou	China	JiangXi	SR	H3
BaiHuaCao	China	ShanDong	HHR	H5-1
SiLiYuan	China	ShanDong	HHR	H1
PingDingHei	China	ShanDong	HHR	H1
MiYangNiuMaoHuang	China	HeNan	HHR	H5-1
ErLiHeiDou	China	ShanDong	HHR	H1
ShuangYangZaoHuangDou	China	JiLin	NR	H1
BaiChengMoShiDou	China	JiLin	NR	H1
XiaoHeiDou18	China	ShanXi	NR	H1
DongLiaoKeShuang	China	JiLin	NR	H2
NiuJiaoQiDaHeiDou	China	ShanDong	HHR	H1
DaHuangDou-1	China	GuiZhou	SR	H4
LuoNingHuangJiaoHeiDaDou	China	HeNan	HHR	H4
DaHeiDou13	China	ShanDong	HHR	H1
DaHuangDou-2	China	GuangDong	SR	H5-1
BaiZhiDou	China	GuangXi	SR	H1
PiXianDaZiHuangCao	China	JiangSu	HHR	H5-1
XuYiDaQingPi	China	JiangSu	HHR	H3
FengChengZaoWuDou	China	JiangXi	SR	H5-2
XiaoHeiDou8	China	ShanXi	NR	H1
TaiXingHeiDou	China	JiangSu	SR	H1
DuChangWuDou	China	JiangXi	SR	H4
XiChuanJiWoHuang	China	HeNan	HHR	H5-1
XinYuDaLiQing	China	JiangXi	SR	H1
HeiDou33	China	ShanXi	NR	H1
MiYunHeiDou	China	BeiJing	NR	H4
ShunYiHeiDou	China	BeiJing	NR	H1
ChangBaiDou	China	ShanXi	NR	H4
XiaoHeiDou13	China	ShanXi	NR	H1
TuHeiDou	China	ShanXi	NR	H1
MaiZiDou	China	ShanXi	NR	H1
XiHeHeiDou	China	NingXia	NR	H1
DaTunXiaoHeiDou2	China	HeBei	NR	H1
XuZhuangDaHeiDou1	China	HeBei	NR	H1
LvSeDou	China	ShanXi	NR	H1
XiaoLvQingDou	China	ShanXi	NR	H2
HuangDou3	China	ShaanXi	NR	H5-1
BaYueZha2	China	ShaanXi	NR	H4
HeiHeiDou3	China	ShaanXi	NR	H1
HeiDou25	China	ShaanXi	NR	H1
HuaiDou	China	ShaanXi	NR	H1
PingDingHuang2	China	ShanDong	HHR	H1
NiuMaoHuang4	China	ShanDong	HHR	H1
WanShuPingDingHuang	China	ShanDong	HHR	H5-1
XiaoHeiDou24	China	ShanDong	HHR	H1
HeiDou20	China	ShanDong	HHR	H1
HongDou2	China	ShanDong	HHR	H1
ChaDou3	China	ShanDong	HHR	H1
ZhengZhouXiaoZiHuangDou	China	HeNan	HHR	H1
XiXianPingDingShiDaDou	China	HeNan	HHR	H5-1
XiXiaXiaoZiHuang	China	HeNan	HHR	H1
NingLingTian'eDan	China	HeNan	HHR	H1
LuoShanTian'eDan	China	HeNan	HHR	H5-2
DanChengDaLiHuang	China	HeNan	HHR	H3
YiYangChangManHeiDou	China	HeNan	HHR	H1
BoAiHongPiZaoJiaoZi	China	HeNan	HHR	H1
LaoShuPi1	China	ShaanXi	HHR	H1
BaYueZha1	China	ShaanXi	HHR	H1
TongShanPingDingWu	China	JiangSu	HHR	H1
PiXianRuanTiaoZhi	China	JiangSu	HHR	H5-1
HuaiYinQingDaDou	China	JiangSu	HHR	H1
WuMing9	China	AnHui	HHR	H3
WuMing3	China	AnHui	HHR	H5-1
WuMing2	China	AnHui	HHR	H1
HeiDou12	China	HeBei	HHR	H1
XiaoHeiDou15	China	HeBei	HHR	H1
HeiDou15	China	HeBei	HHR	H1
XiaoHeiDou16	China	HeBei	HHR	H1
LaoShuPi2	China	ShaanXi	HHR	H5-2
BaYueZha3	China	ShaanXi	HHR	H4
HongHuangDou3	China	ShaanXi	HHR	H1
ZhenZhuAi	China	GanSu	HHR	H4
RuGaoJiaJiaSan	China	JiangSu	SR	H5-1
WuChangLiuYueBao	China	HuBei	SR	H3
YuGanZaoHuangDou	China	JiangXi	SR	H5-2
HongPiHuangDou	China	HuBei	SR	H5-1
LinShuiDongDou	China	SiChuan	SR	H4
BenDiHuang	China	AnHui	SR	H3
WuXiHuangDou	China	SiChuan	SR	H5-1
FuShunWuZaoDou-1	China	SiChuan	SR	H5-1
PengXianHeiPiDou	China	SiChuan	SR	H4
BaiMaoDou1	China	GuiZhou	SR	H5-1
HeiKeDou	China	GuiZhou	SR	H4
MaoJiHui	China	GuiZhou	SR	H5-1
JingXiZaoHuangDou	China	GuangXi	SR	H5-1
DaBaiShuiDou-2	China	GuiZhou	SR	H4
QiYueZaoHuangDou-1	China	GuiZhou	SR	H5-1
DaBaiShuiDou2	China	GuiZhou	SR	H5-1
ChaDou6	China	GuiZhou	SR	H4
ChaShanHeiDou	China	GuangDong	SR	H5-2
YuanShanHuangDou	China	GuangDong	SR	H5-2
TaiCangHuangMaoDouYi	China	JiangSu	SR	H3
HanChuanHouZiMao	China	HuBei	SR	H5-1
HouZiMao	China	HuBei	SR	H5-1
TongShanDaLiJiangPiHuang	China	HuBei	SR	H4
XiangZhuDou	China	ZheJiang	SR	H5-1
QingPiQingRen	China	ZheJiang	SR	H5-2
HengFengMaYiWo	China	JiangXi	SR	H5-1
GaoShanNiuMaoHuang	China	HuBei	SR	H4
JiuYueHan	China	HuBei	SR	H5-1
HeiNiDou	China	HuBei	SR	H4
LvKeDou	China	HuBei	SR	H4
XiaoHeiDou19	China	SiChuan	SR	H4
ZaoHuangDou-7	China	GuiZhou	SR	H5-1
LiuYueHuang-3	China	GuiZhou	SR	H5-1
HuangPiDaDou	China	GuiZhou	SR	H5-1
HuangDouZi-4	China	GuiZhou	SR	H4
HeiKeWuDou	China	HaiNan	SR	H4
SiCunHeiDou	China	GuangXi	SR	H4
MaShanRenFengHuangDou	China	GuangXi	SR	H5-2
QingHuaDaDou	China	YunNan	SR	H4
XiaoDongHuangDou	China	YunNan	SR	H1
SiJiDou	China	YunNan	SR	H4
DaLvDou	China	YunNan	SR	H4
HeiDou34	China	YunNan	SR	H5-1
BaYueHuang5	China	AnHui	SR	H5-1
ChangLinQingDou	China	AnHui	SR	H3
WeiGuanQing	China	AnHui	SR	H4
NiuKenZhuang	China	HuBei	SR	H5-1
XiaoKeHuangDou2	China	HuBei	SR	H5-1
WuHuangDou	China	HuBei	SR	H5-2
XiaoQingDou	China	ZheJiang	SR	H1
HuangPiTianGengDou-1	China	FuJian	SR	H5-1
XiaoHuangDou-2	China	FuJian	SR	H5-1
TianGengDou	China	ZheJiang	SR	H5-1
ChangTingGaoJiaoHongHuaQing	China	FuJian	SR	H5-1
WuGuMaoDou	China	ZheJiang	SR	H5-2
QingPiDou3	China	ZheJiang	SR	H5-1
QiuLiBai	China	ZheJiang	SR	H4
HuaShengDou	China	ZheJiang	SR	H1
Gao'AnBaYueHuang	China	JiangXi	SR	H5-1
NiDou2	China	JiangXi	SR	H4
TieZiDou	China	JiangXi	SR	H5-1
DaTunXiaoHeiDou1	China	HeBei	NR	H1
QinYangShuiDou	China	HeNan	HHR	H1
HengChuanChaSeDou	China	HeNan	HHR	H3
QianJinErHao	China	HeBei	HHR	H1
HongHuangDou1	China	GanSu	HHR	H3
HeiDou5	China	HeBei	HHR	H4
SiLiuQiHeiDou	China	ShanDong	HHR	H1
TaiHeYuanGunZhu	China	AnHui	HHR	H5-1
WoYangHeiDou	China	AnHui	HHR	H1
LuXianTiePiDou	China	SiChuan	SR	H4
JinXianLiuYueBao	China	JiangXi	SR	H5-2
HeiDouZi1	China	SiChuan	SR	H4
PuJiangLiuYueHuang-2	China	SiChuan	SR	H4
AnYueQingPiDou	China	SiChuan	SR	H4
YouYangDaHeiDou	China	SiChuan	SR	H5-1
GaoQiaoHeDou2	China	HuNan	SR	H4
DongAnZiPiDou	China	HuNan	SR	H4
LiuYueZaoHuangDou	China	GuiZhou	SR	H5-1
XiHuangDou-9	China	GuiZhou	SR	H5-1
BaoGuHuang-8	China	GuiZhou	SR	H4
ShanBaiDou	China	ZheJiang	SR	H4
XinYangYangYanDou	China	HeNan	HHR	H1
GanYuLuoYeQingYi	China	JiangSu	HHR	H5-1
ErJiZaoDou-2	China	GuiZhou	SR	H5-1
GanLuanZi	China	HeBei	HHR	H1
DaLaoShuPi	China	ShaanXi	HHR	H4
DaBaiPi	China	ShanDong	HHR	H1
DongShanBaiMaDou	China	FuJian	SR	H1
QiYueHuang-1	China	GuiZhou	SR	H4
TongHuaPingDingXiang	China	JiLin	NR	H4
GunLongZhu	China	ShanDong	HHR	H1
HeiDou30	China	HeBei	HHR	H1
MaDaiQingDou-2	China	GuangDong	SR	H4
XiaHeiDou2	China	ShanXi	NR	H4
HeiDou23	China	ShanXi	NR	H3
YinManZiHeiDou	China	ShanXi	NR	H1
DaiMiDou	China	HuBei	SR	H1
BeiGaoHuangHeiDou	China	HeBei	NR	H1
XiaoHuangDou5	China	ShanDong	HHR	H5-1
QiYueZha	China	ShanDong	HHR	H1
YongChengXiaoQingDou	China	HeNan	HHR	H1
DanChengTieJiaoQing	China	HeNan	HHR	H1
ZhengZhouDaZiQingDou	China	HeNan	HHR	H1
ShangQiuZhuGanQing	China	HeNan	HHR	H5-1
XiaoHeiDou1	China	HeBei	HHR	H1
MinQuanNiuMaoHuang	China	HeNan	HHR	H1
DaLiDou1	China	ZheJiang	SR	H5-1
MaLiaoDou	China	ZheJiang	SR	H4
MiaoXiaDaDou	China	ZheJiang	SR	H5-2
HeiDou6	China	HeBei	HHR	H4
YiWoHou	China	ShanDong	HHR	H1
RuNanPingDingShi	China	HeNan	HHR	H1
XiNong509	China	ShaanXi	HHR	H1
TongShanTian'eDan	China	JiangSu	HHR	H1
ShengLi3Hao	China	ShanDong	HHR	H2
HeiDou13	China	HeBei	HHR	H1
ShiGuanYingQingDou	China	HeBei	HHR	H4
YangYanDou1	China	YunNan	SR	H4
ZaDou-6	China	GuiZhou	SR	H5-1
DaHeiDou3	China	HeBei	HHR	H1
YuanHeiDou1	China	HeBei	HHR	H1
SiJiaoQiHeiDou	China	HeBei	HHR	H1
BaYueMang1	China	HeBei	HHR	H1
XiaoHeiDou5	China	HeBei	HHR	H4
JiangSeDou1	China	HeBei	HHR	H1
ErHeiDou	China	ShanXi	NR	H1
GaoJiaYingHeiDou	China	HeBei	NR	H1
YaoJiaoHuang2	China	ShanDong	HHR	H1
NiuMaoHuang6	China	ShaanXi	HHR	H1
NiuPiHuangDou	China	ShaanXi	HHR	H5-1
HuangHuaZao	China	ShaanXi	HHR	H5-2
JiangHuangDou	China	ShaanXi	HHR	H5-1
MaHuangDou	China	GanSu	HHR	H4
HaoXianQianJinDou	China	AnHui	HHR	H3
QingDou2	China	AnHui	HHR	H5-1
DangShanDaCanKe	China	AnHui	HHR	H1
ChaPiDou	China	AnHui	HHR	H1
XingHuaMaShiZiYi	China	JiangSu	SR	H5-1
LiuHeHongMaoQingJia	China	JiangSu	SR	H1
DanTuDaHongPao	China	JiangSu	SR	H5-1
HuaSeDou	China	HuBei	SR	H4
BaoJiaoHuang	China	SiChuan	SR	H5-1
YouXianHeDou	China	HuNan	SR	H5-1
GuiChiNiuMaoHuang	China	AnHui	SR	H5-1
DaHuangMao	China	SiChuan	SR	H5-1
BaiMaoDou3	China	GuiZhou	SR	H4
PoHuang	China	GuangDong	SR	H2
QingKeDou	China	ZheJiang	SR	H1
JiuYueMang	China	AnHui	SR	H3
QiYueHuang	China	HuBei	SR	H4
GuHuangDou-4	China	FuJian	SR	H4
DaBaiDou2	China	YunNan	SR	H5-1
