# Supplementary material for: Selection of the Salt Tolerance Gene GmSALT3 During Six Decades of Soybean Breeding in China
Source: Front Plant Sci. 2021 Nov 16;12:794241. doi: 10.3389/fpls.2021.794241 (PMC8635242; doi:10.3389/fpls.2021.794241)
Supplement: Supplementary file 4 [file Table_2.XLSX]

## Sheet: Sheet1
Table S2 Polymorphic sites in 5'UTR and genomic region of GmSALT3 in 279 Chinese soybean landraces.
Position in Wm82.a2.v1		38610876	38610884	38610964	38611022	38611046	38611240	38611251	38611255	38611256	38611334	38611480	38611572	38611581	38611660	38611676	38611722	38611738	38611757	38611863	38611908	38611958	38611969	38613164	38613267	38613626	38613722	38613790	38614341	38614357	38614529	38614613	38615620	38615700	38615986	38619945	38620102	38620149	38620214	38620934	38620944	38620955	38621020	38621130	38621131	38621135	38621334	38621558	38621602
Haplotype		5'UTR			Exon		Intron																						Exon	Intron				Exon		Intron							Exon
H01		C	A	C	A	C	C	T	G	T	C	G	TA	C	T	A	A	A	C	T	T	C	C	A	G	G	C	T	GTGCT	G	T	A	G	A	A	T	CT	TA	G	C	T	A	C	G	C	A	G	T	G
H02		C	C	G	A	C	C	T	G	T	C	G	TA	C	T	A	A	A	C	T	T	C	A	G	G	T	C	T	GTGCT	G	T	A	G	A	A	T	CT	T	G	C	T	A	C	G	C	A	G	T	G
H03		CTCGA	C	G	T	T	G	T	A	C	T	G	TA	C	T	C	G	T	C	T	T	T	C	G	G	T	C	A	GTGCT	A	C	A	G	T	T	C	C	TA	G	A	C	G	C	T	G	A	C	G	A
H04		CTCGA	C	G	T	T	G	T	A	C	T	G	TA	C	T	C	G	T	C	T	T	T	C	G	G	T	C	A	GTGCT	A	C	A	T	T	T	C	C	TA	G	A	C	G	C	G	C	A	C	G	A
H05	-1	CTCGA	C	G	T	T	G	C	A	C	T	G	TA	C	T	C	G	A	C	A	T	T	C	G	G	T	C	A	G	A	C	T	G	T	T	C	C	TA	A	C	T	A	C	G	C	G	G	T	G
H05	-2	CTCGA	C	G	T	T	G	T	A	C	T	A	T	T	C	C	G	A	T	T	A	C	C	G	A	T	T	A	G	A	C	T	G	T	T	C	C	TA	A	C	T	A	G	G	C	G	G	T	G
[truncated: 9 more columns]
